# Supplementary material for: Selection for infectivity profiles in slow and fast epidemics, and the rise of SARS-CoV-2 variants
Source: eLife journal article supplement (doi:10.7554/elife.75791), 2022-05-19
Supplement: supp [file elife-75791-supp-v1.zip]

Archive with 7 entries (7 files):
- elife_poa_e75791_Transparent_Reporting_File.pdf
- elife_poa_e75791_Figure_2_figure_supplement_1.pdf
- elife_poa_e75791_Figure_3_figure_supplement_1.pdf
- elife_poa_e75791_Figure_3_figure_supplement_2.pdf
- elife_poa_e75791_Figure_3_figure_supplement_3.pdf
- elife_poa_e75791_Figure_5_figure_supplement_1.pdf
- elife_poa_e75791_Figure_5_figure_supplement_2.pdf
