# Supplementary material for: Selection for infectivity profiles in slow and fast epidemics, and the rise of SARS-CoV-2 variants
Source: eLife journal article supplement (doi:10.7554/elife.75791), 2022-05-19

Time series runs 10 days after sharp decline in  $R_{0,H}(t)$

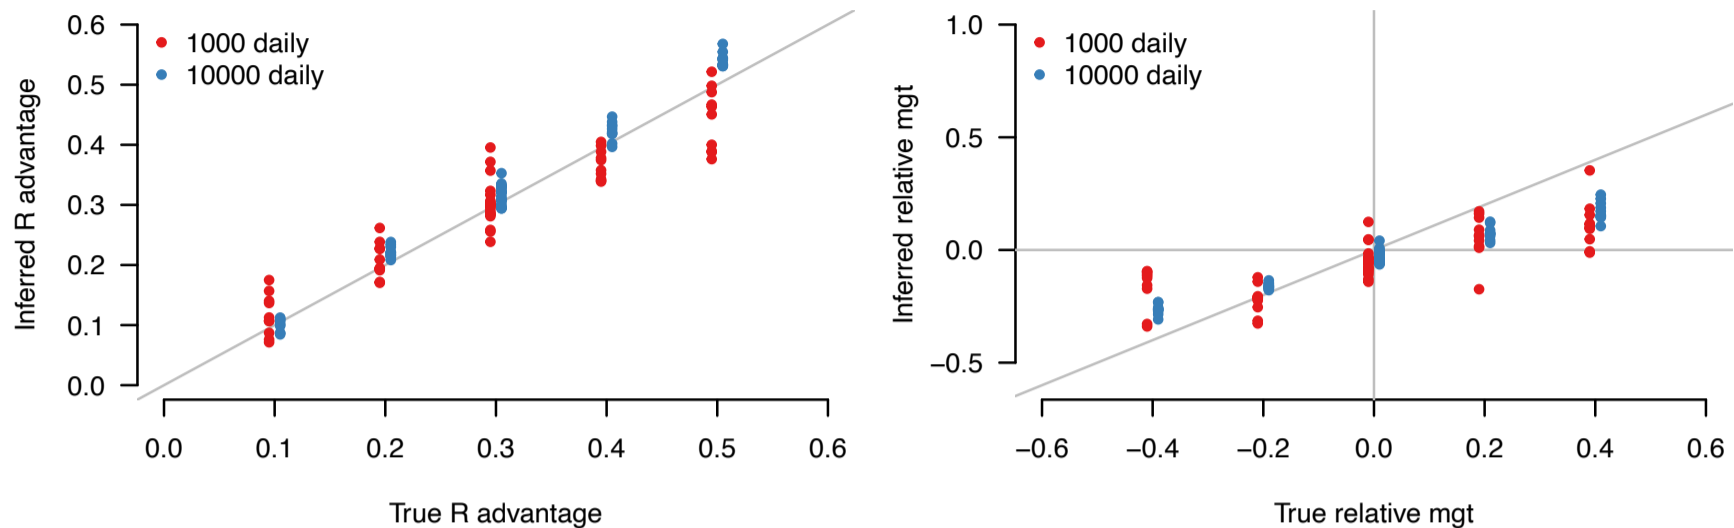

Time series runs 20 days after sharp decline in  $R_{0,H}(t)$

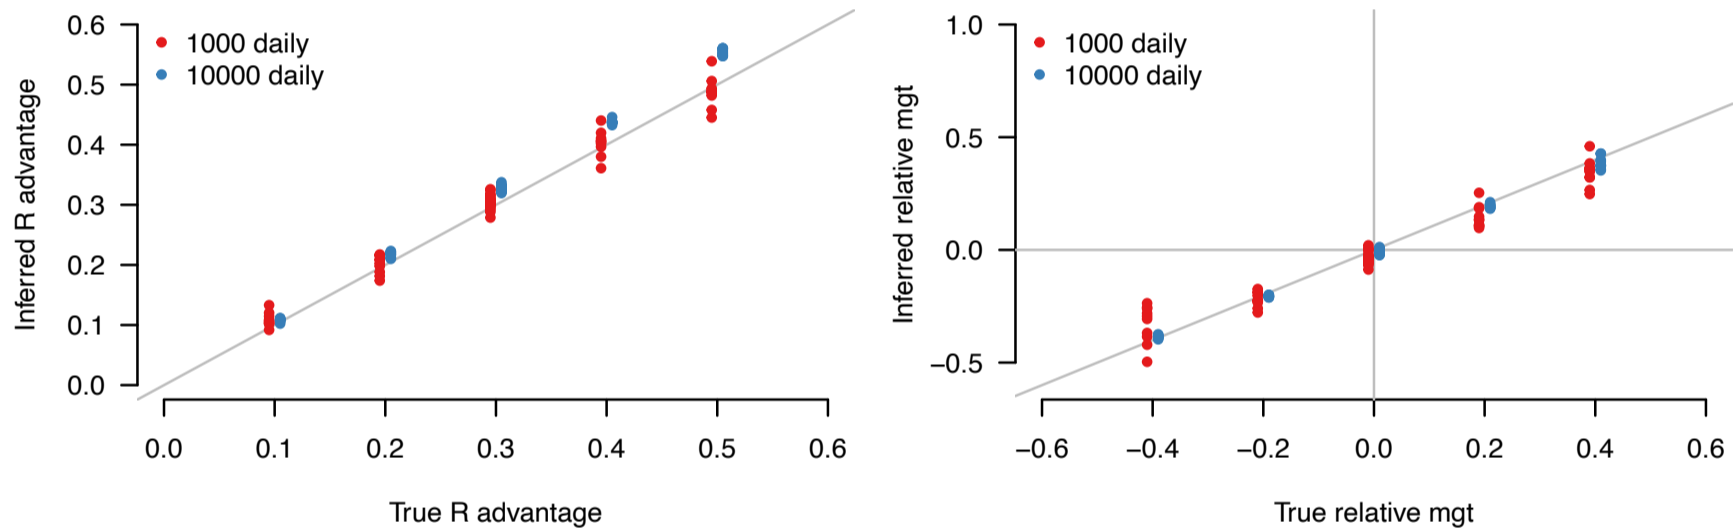

Time series runs 30 days after sharp decline in  $R_{0,H}(t)$

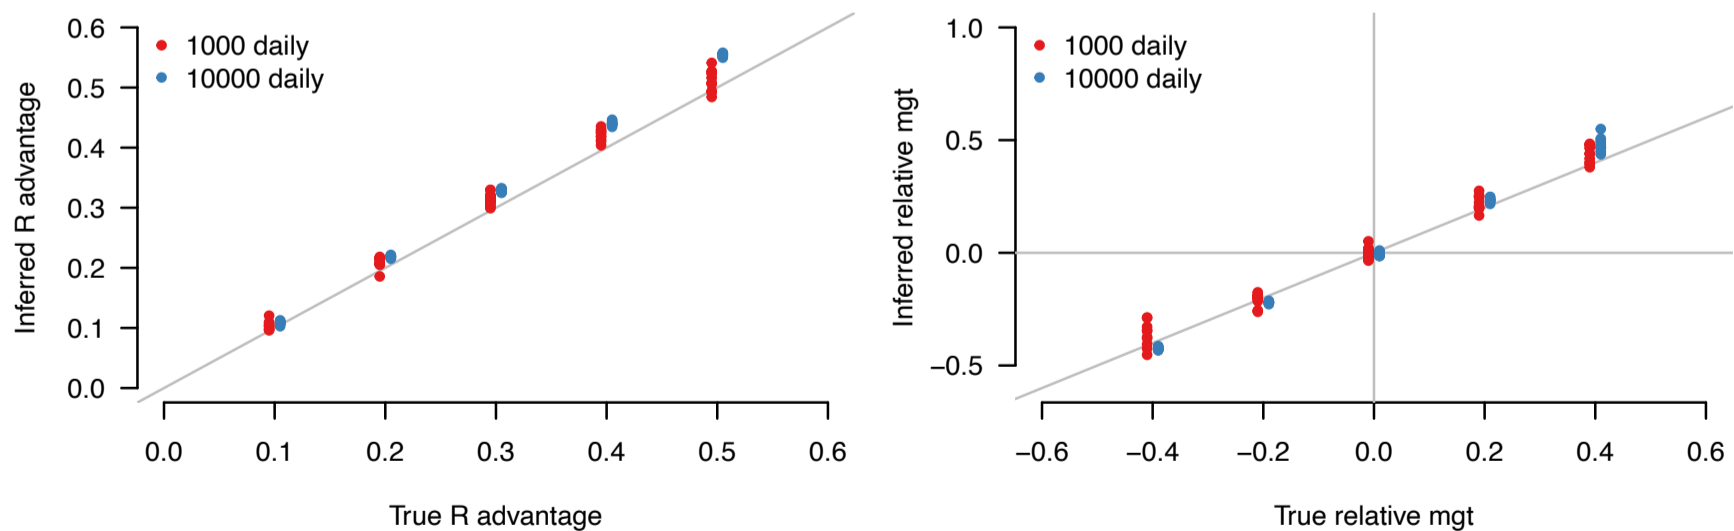

Supplement: supp [file elife-75791-supp-v1.zip › elife_poa_e75791_Figure_3_figure_supplement_3.pdf]
