# Supplementary figures and images for: Selection for infectivity profiles in slow and fast epidemics, and the rise of SARS-CoV-2 variants
Source: eLife journal article supplement (doi:10.7554/elife.75791), 2022-05-19

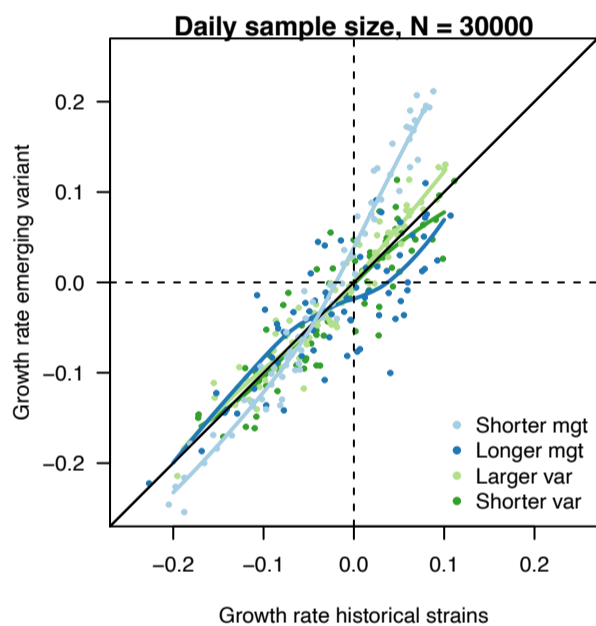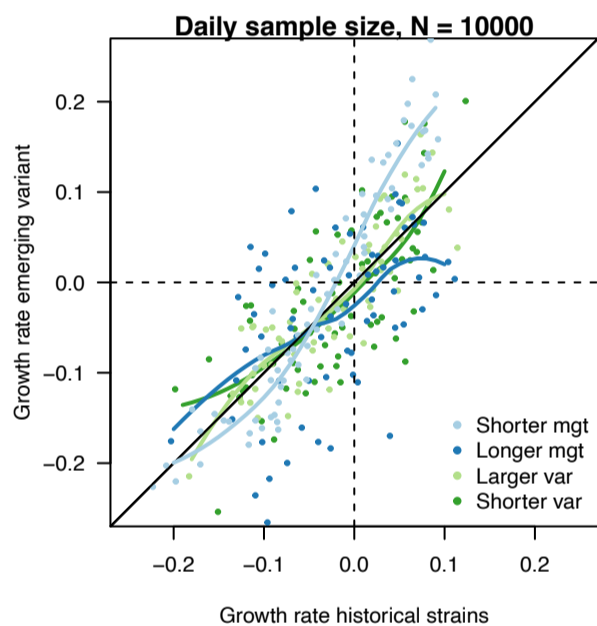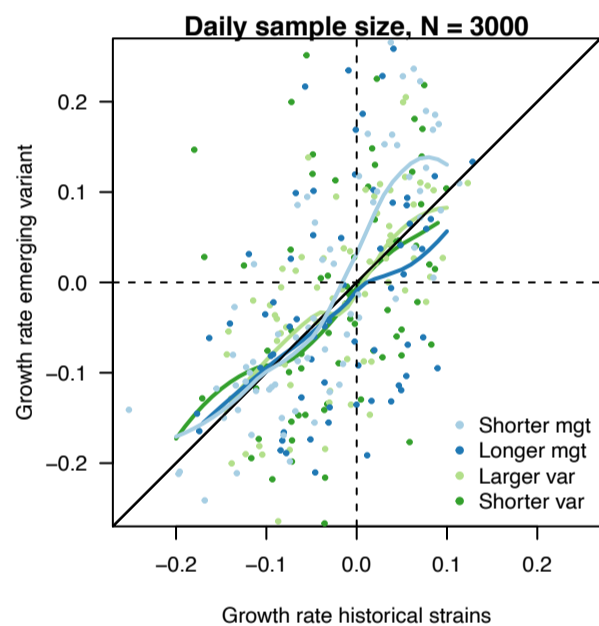

Supplement: supp [file elife-75791-supp-v1.zip › elife_poa_e75791_Figure_2_figure_supplement_1.pdf]

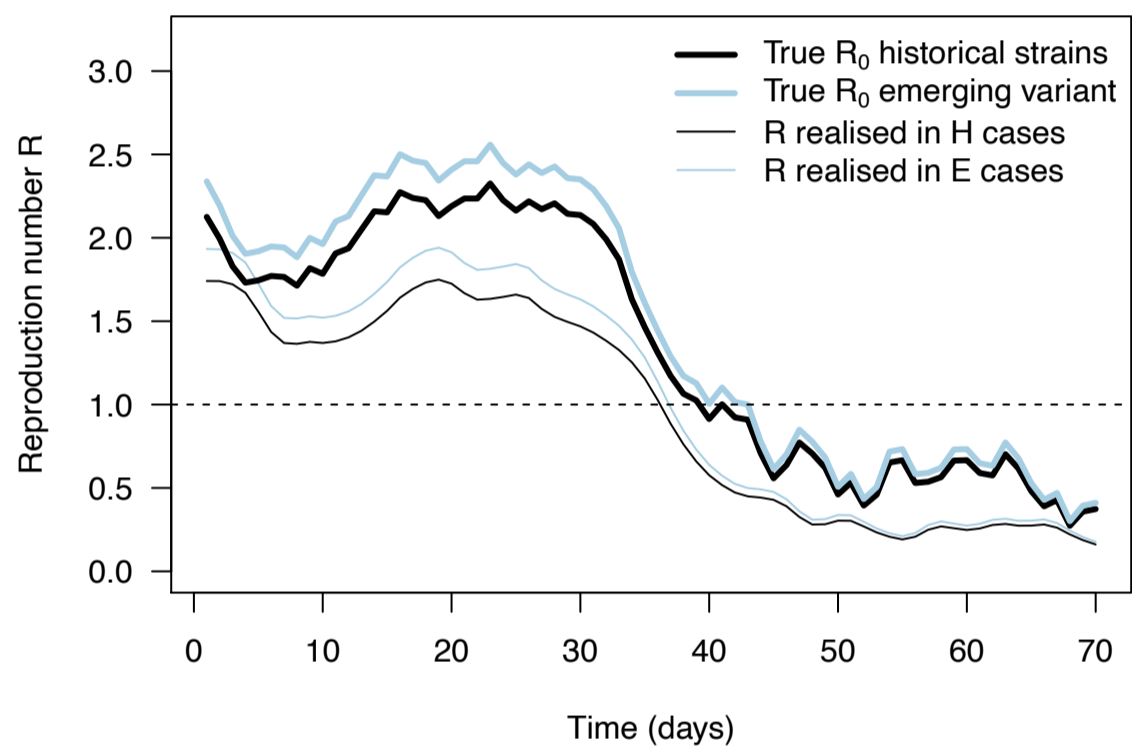

Supplement: supp [file elife-75791-supp-v1.zip › elife_poa_e75791_Figure_3_figure_supplement_1.pdf]

Large variability in  $R_{0,H}(t)$  (1.5 to 0.5)

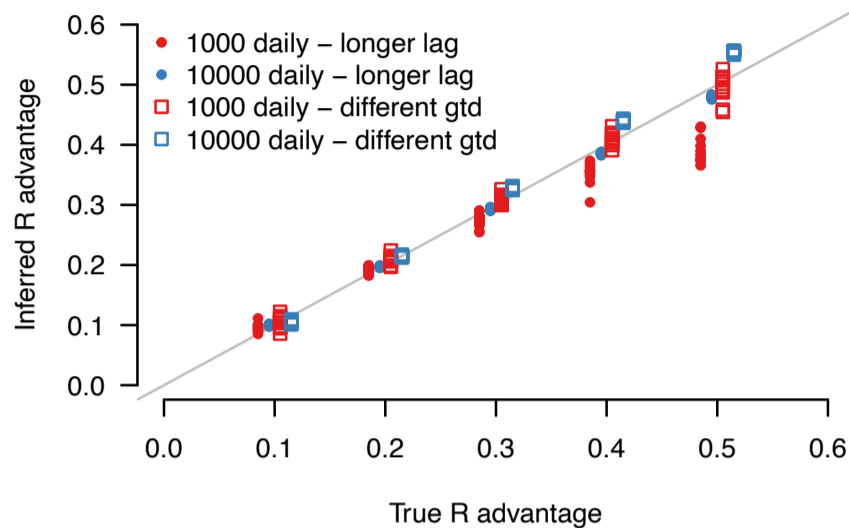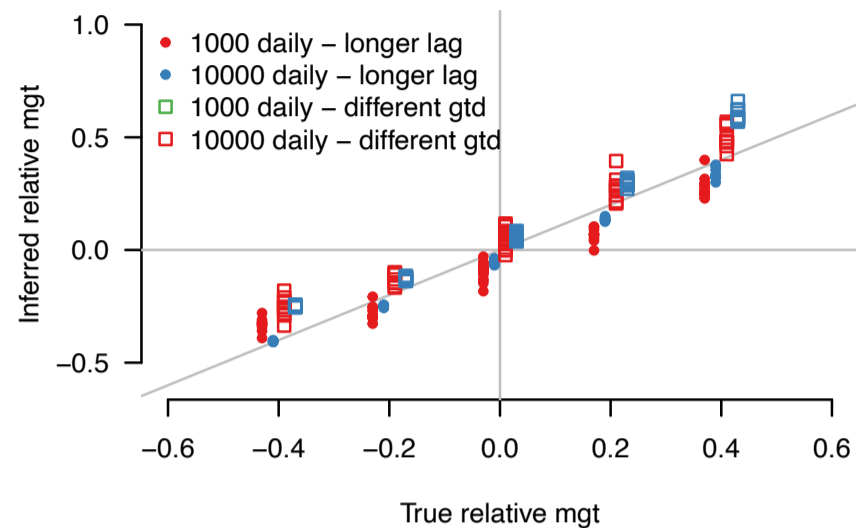

Medium variability in  $R_{0,H}(t)$  (1.3 to 0.7)

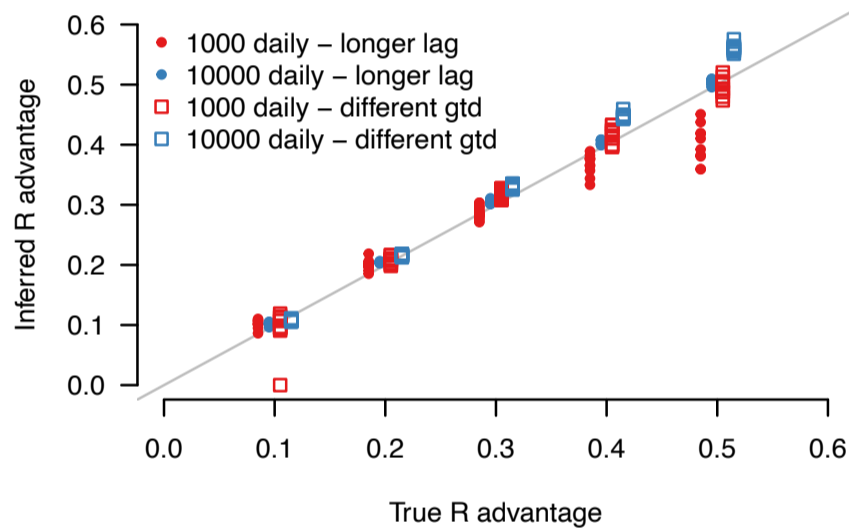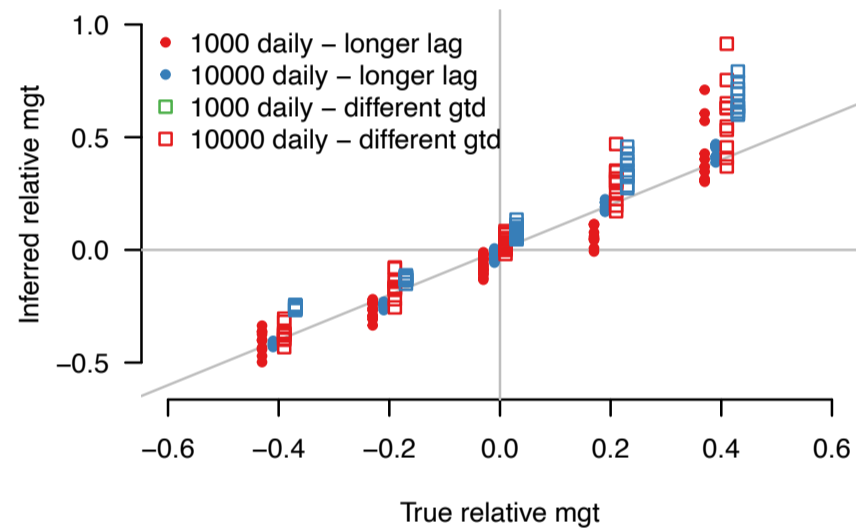

Small variability in  $R_{0,H}(t)$  (1.1 to 0.9)

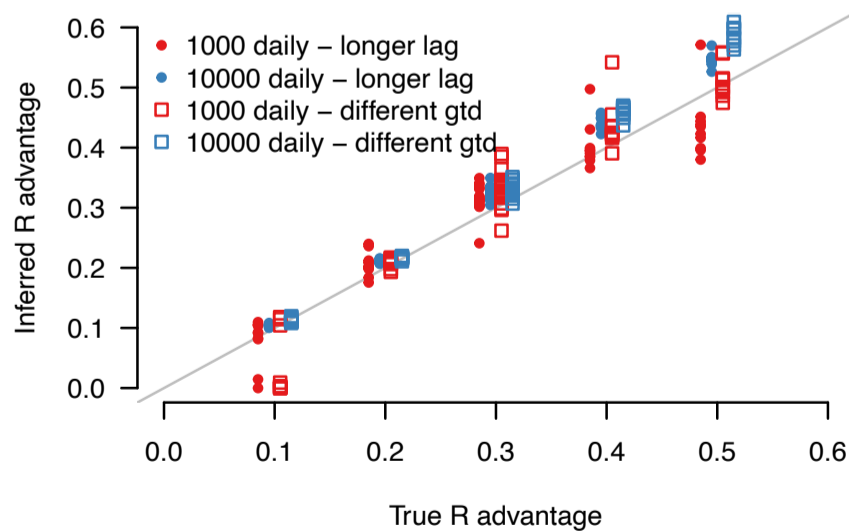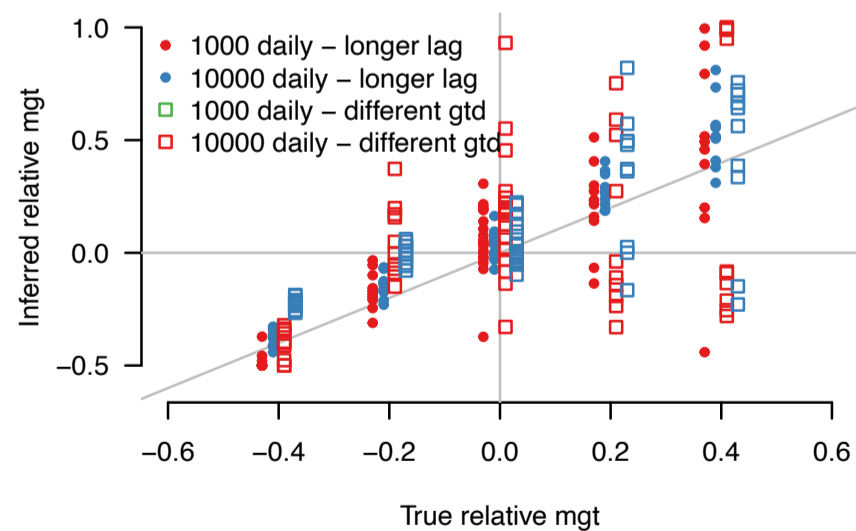

Supplement: supp [file elife-75791-supp-v1.zip › elife_poa_e75791_Figure_3_figure_supplement_2.pdf]

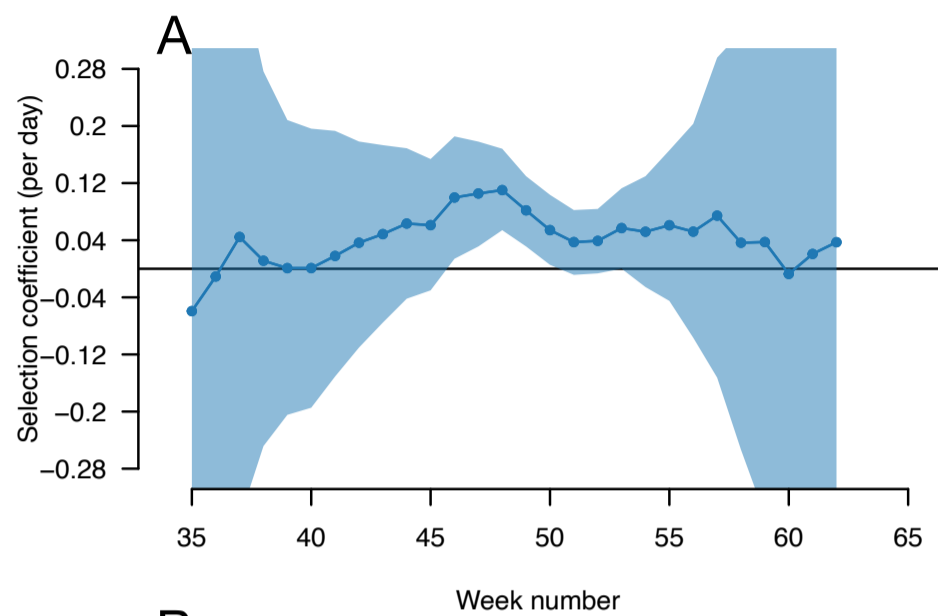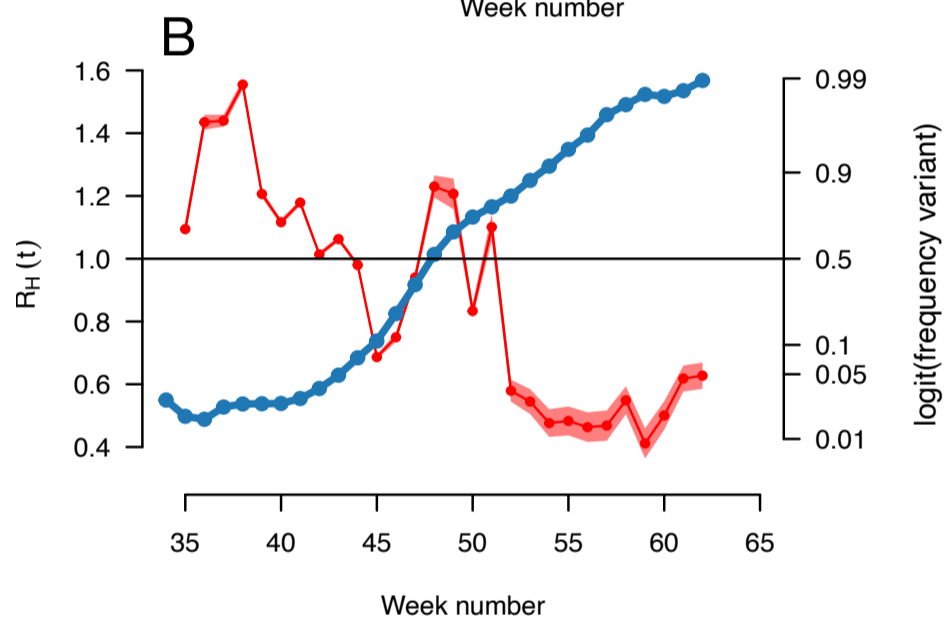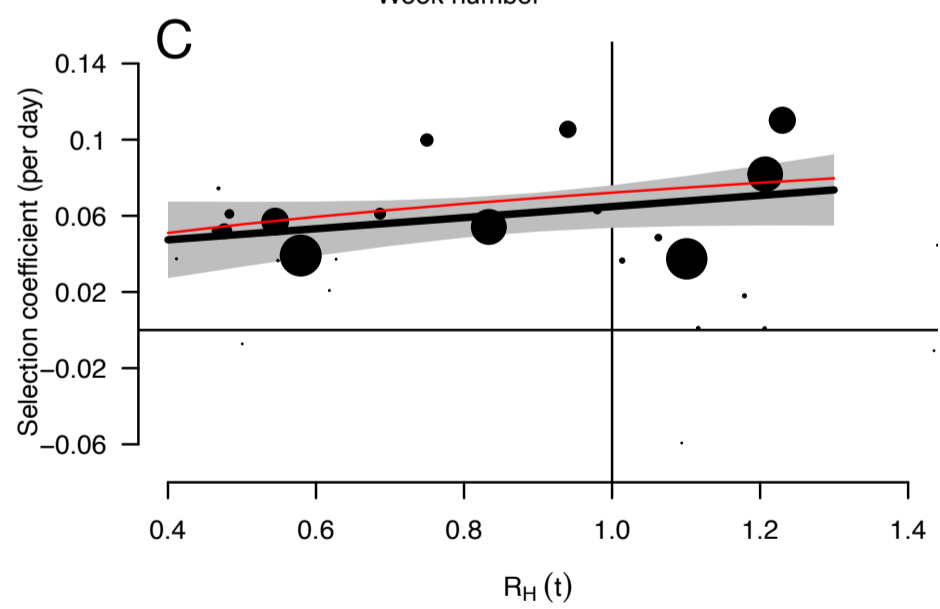

Supplement: supp [file elife-75791-supp-v1.zip › elife_poa_e75791_Figure_5_figure_supplement_1.pdf]

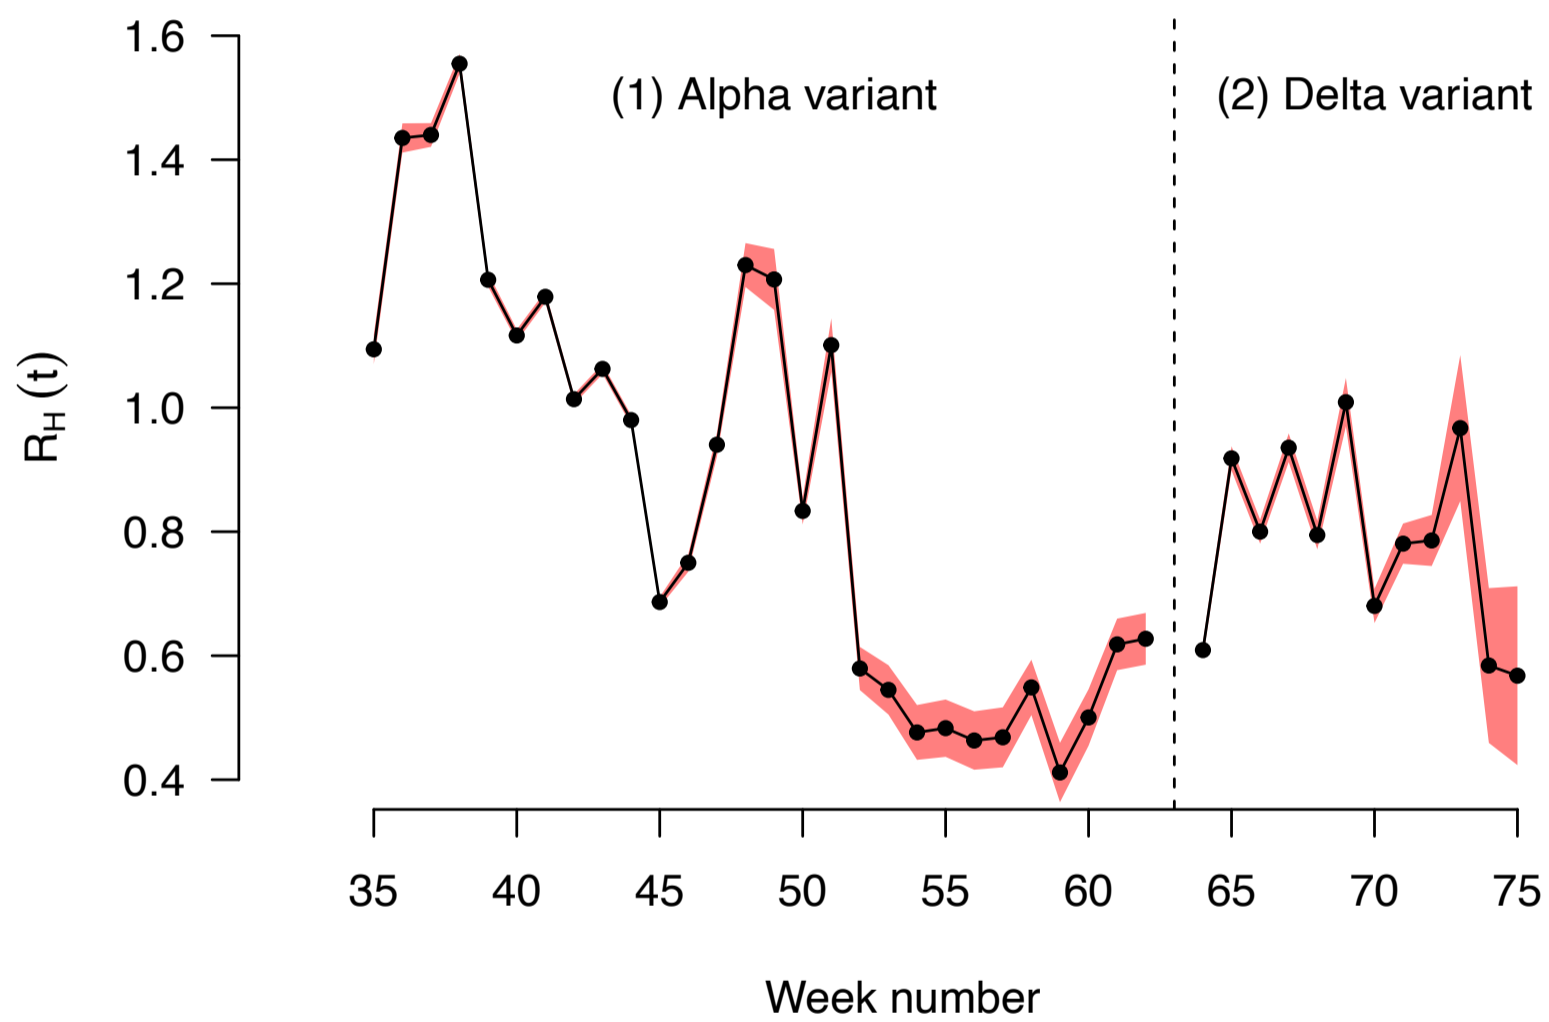

Supplement: supp [file elife-75791-supp-v1.zip › elife_poa_e75791_Figure_5_figure_supplement_2.pdf]
